# Supplementary material for: RECQL5 plays co-operative and complementary roles with WRN syndrome helicase
Source: PubMed Central journal article supplement — Nucleic Acids Res. 2012 Nov 22;41(2):881–99. doi: 10.1093/nar/gks1134 (PMC3553943; doi:10.1093/nar/gks1134), 2012-11-22
Supplement: supp_gks1134_nar-02630-h-2012-File004.pdf [file supp_gks1134_nar-02630-h-2012-File004.pdf]

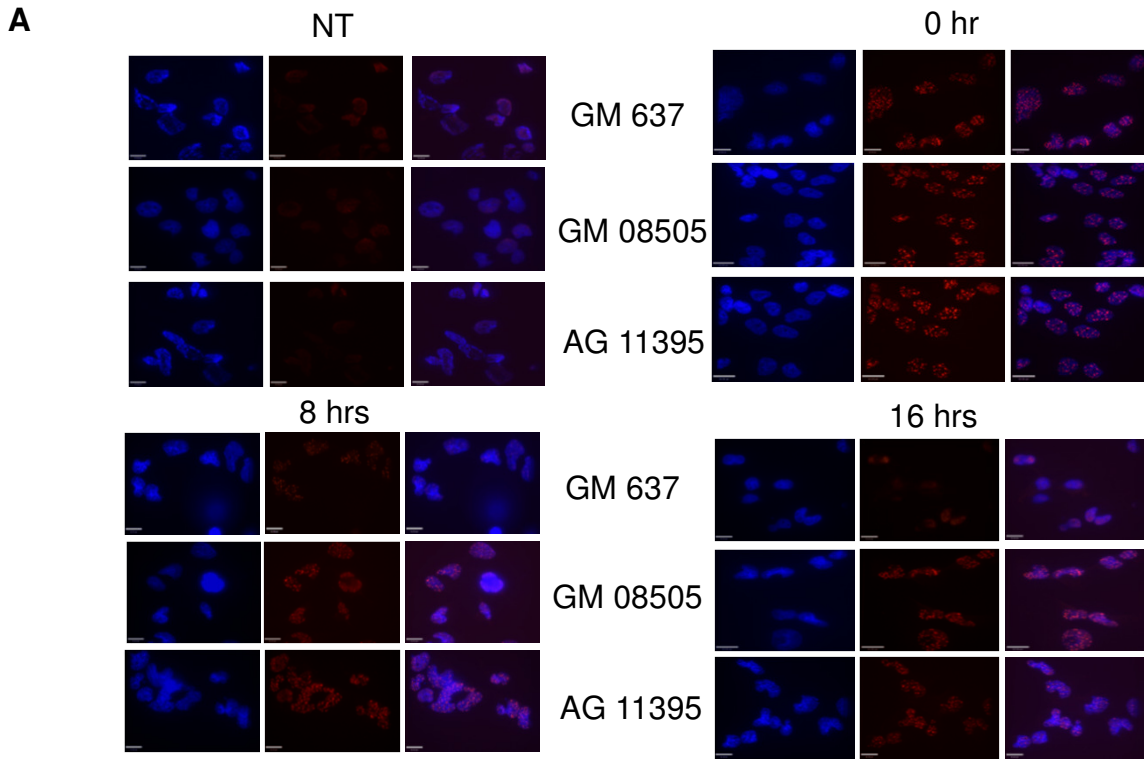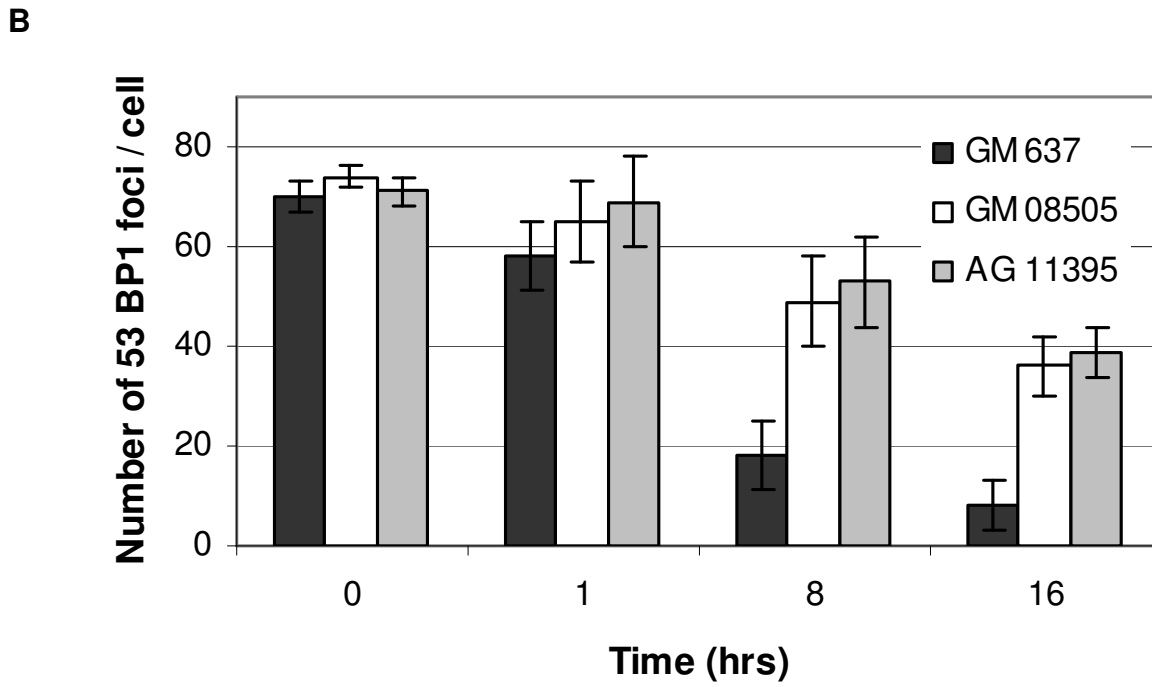

Supplementary Figure 1

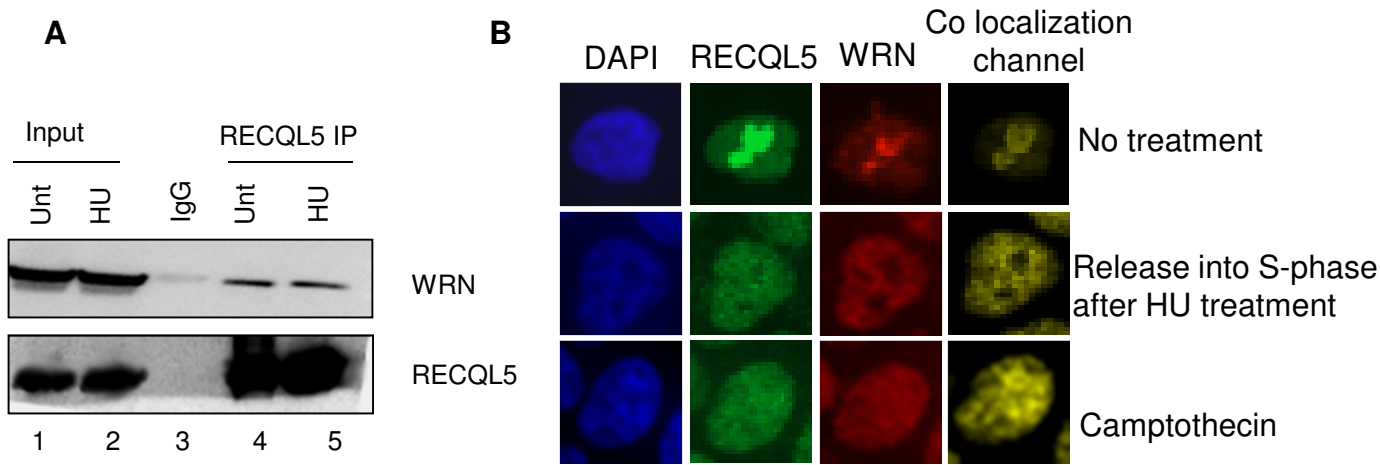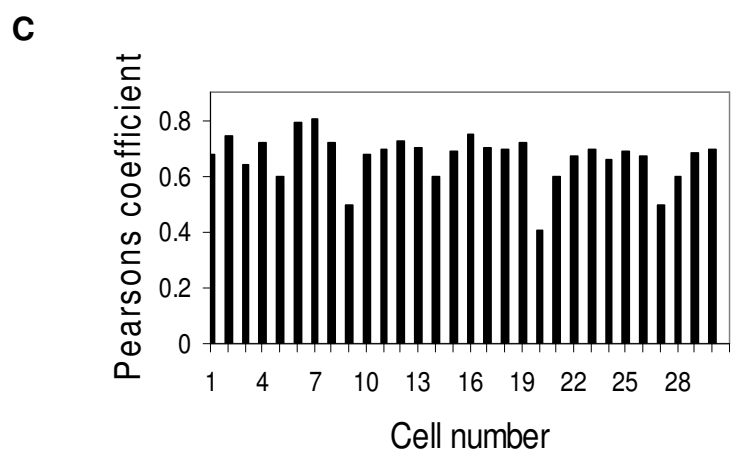

**Supplementary Figure 2**

**A**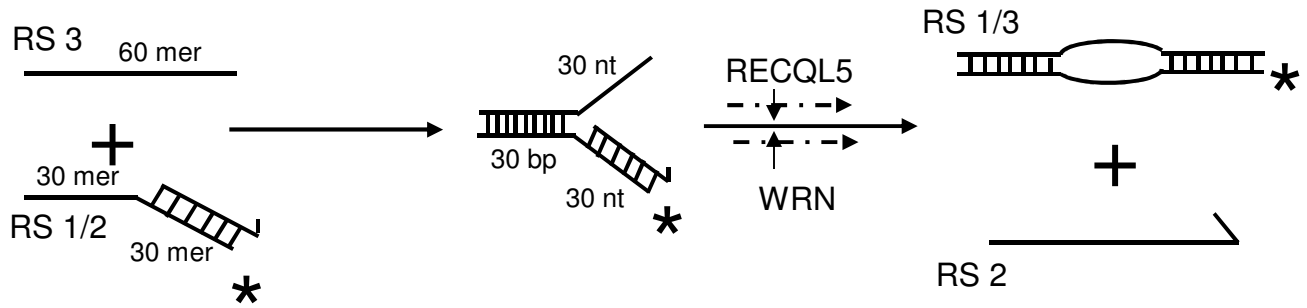**B**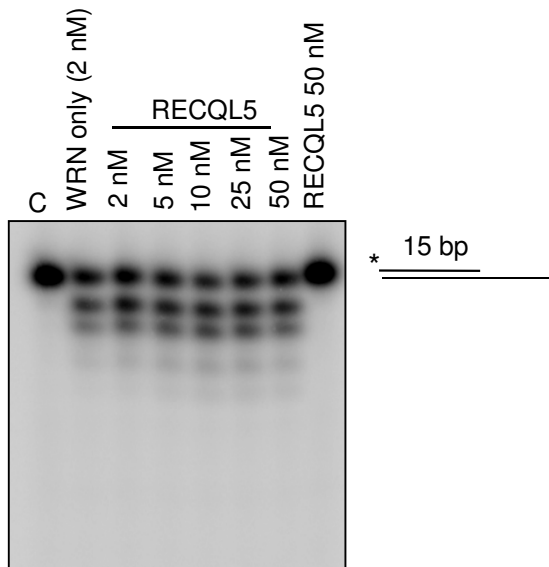**C**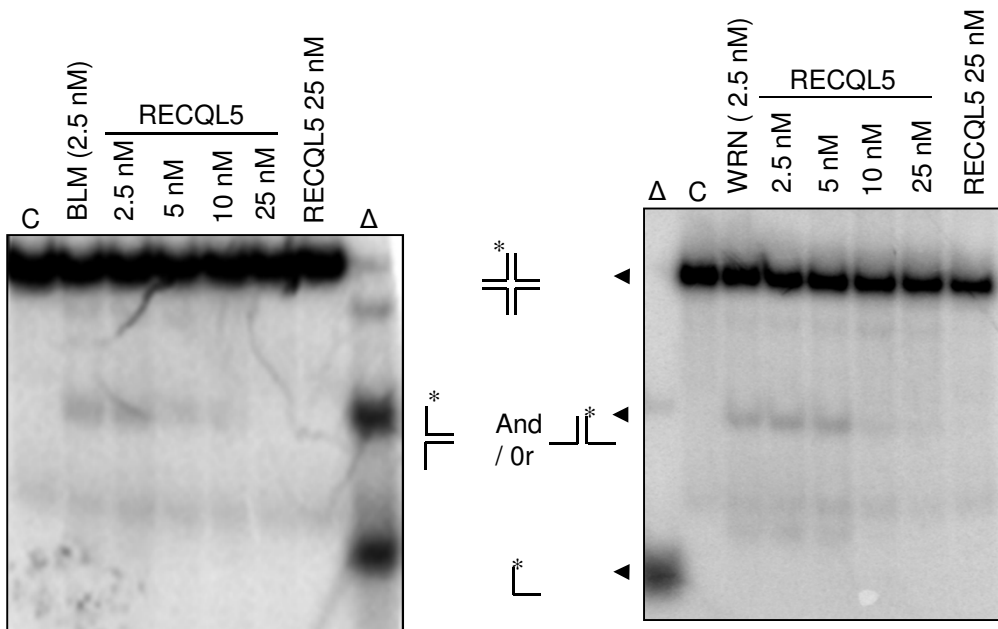

Supplementary Figure 3

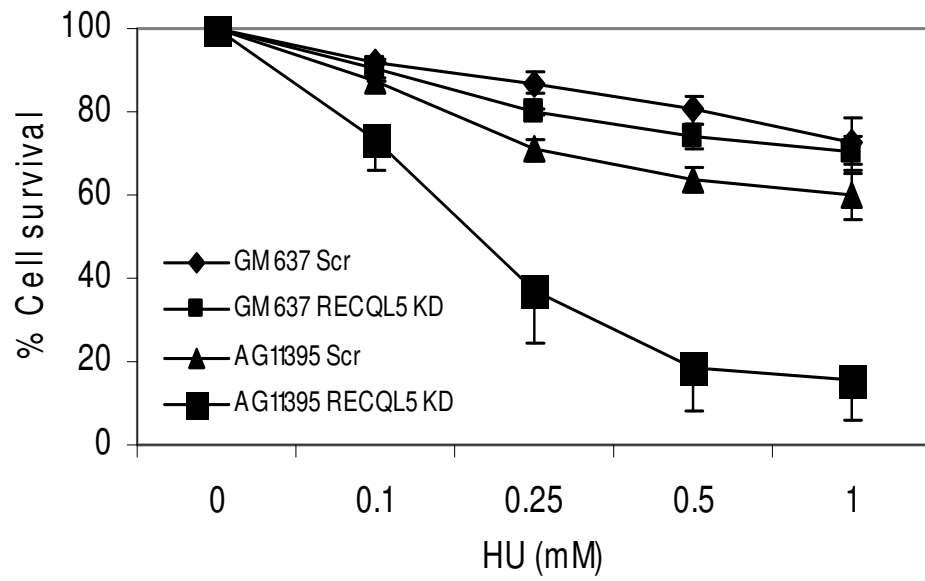

**Supplementary Figure 4**

**A**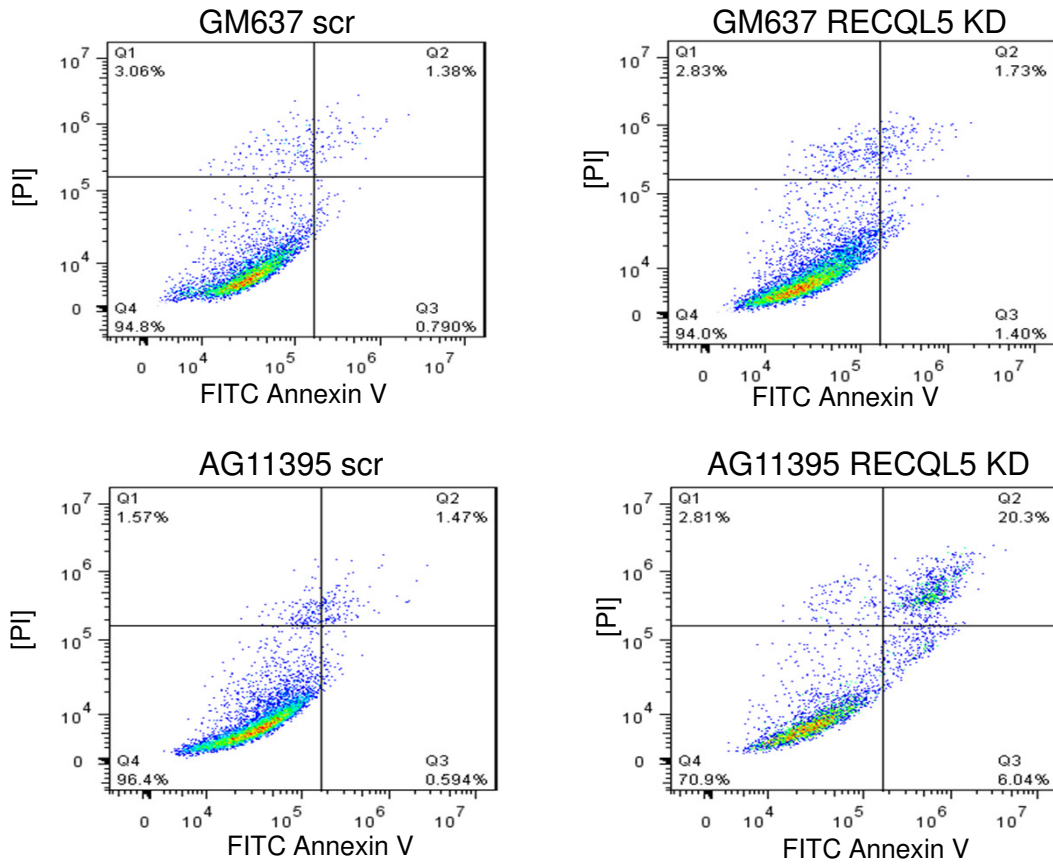**B**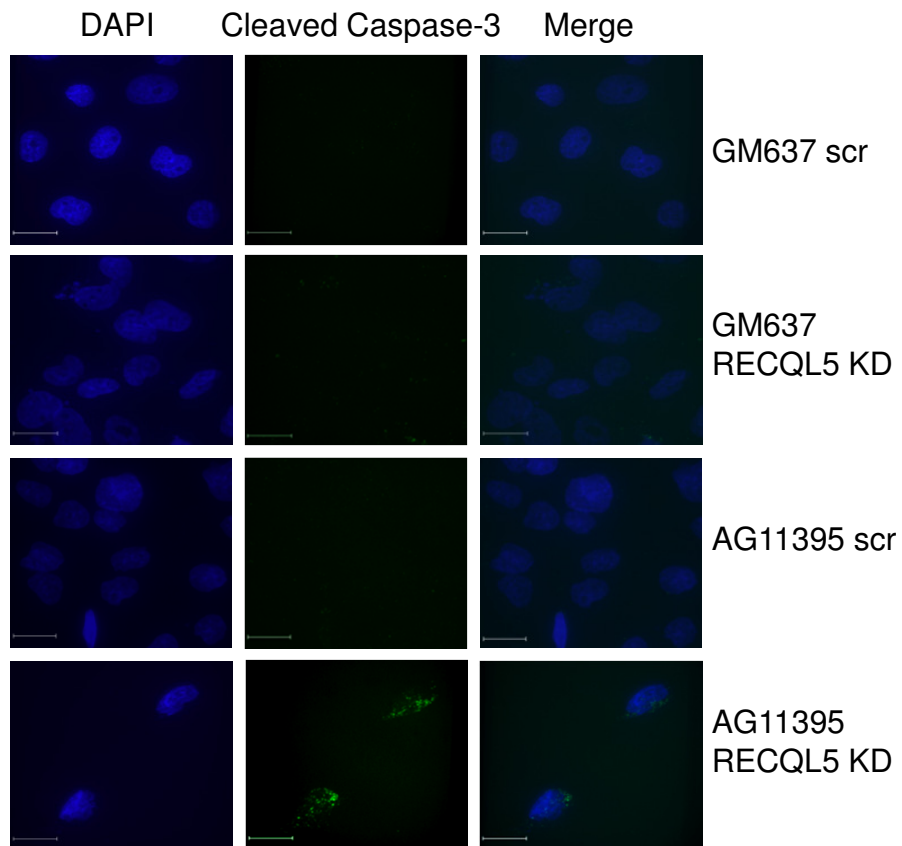**Supplementary figure 5**

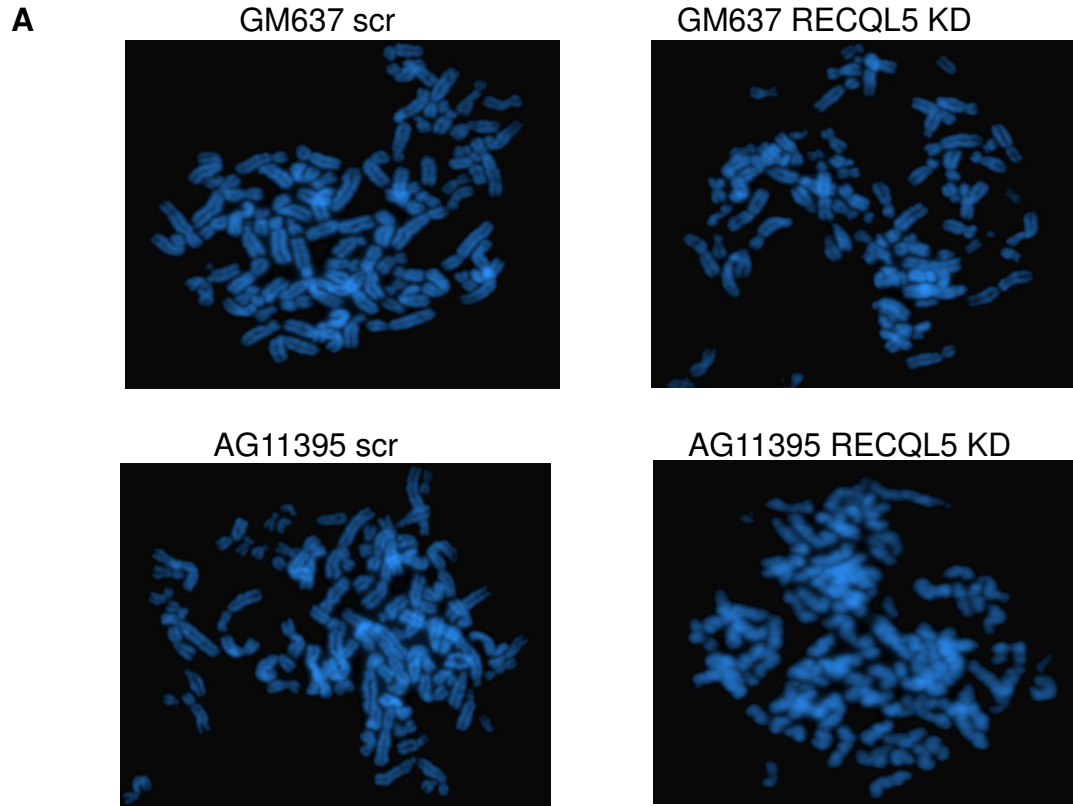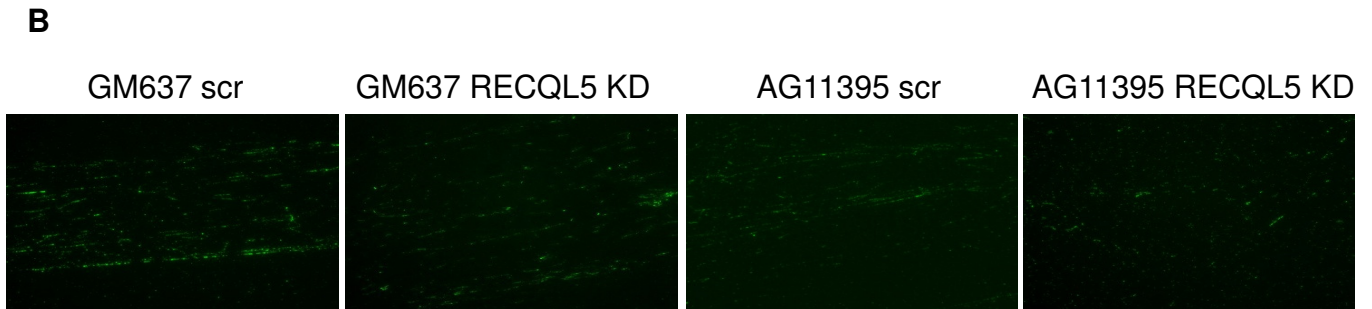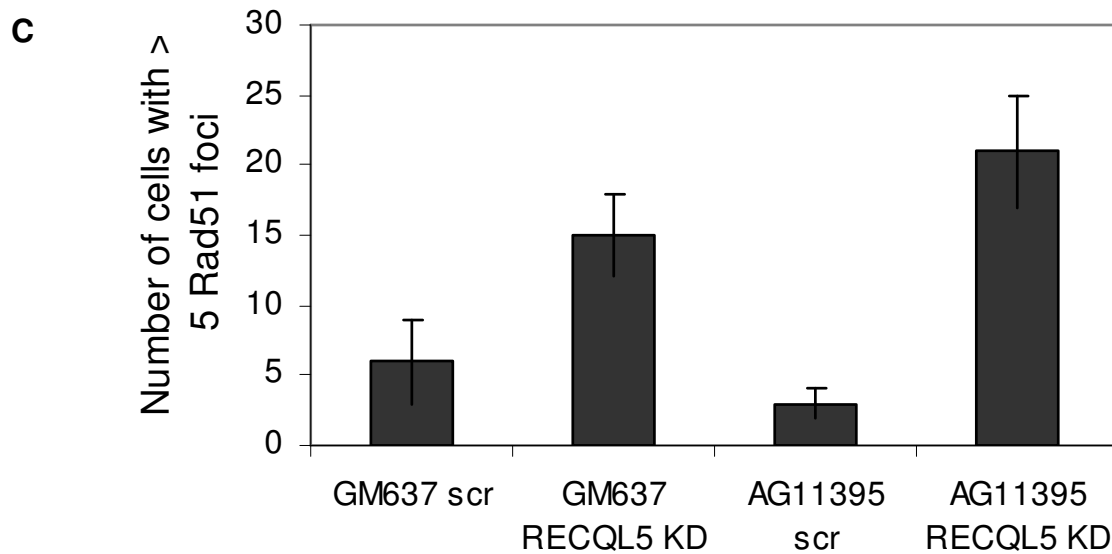

**Supplementary figure 6**
